# Supplementary figures and images for: [Retracted] Spondias purpurea L. Bark Extract Protects against Oxidative Stress and Reduces Hypercholesterolemia in Mice Fed High‐Fat Diet
Source: Hindawi journal article supplement (doi:10.1155/2022/3046483), 2022-01-01

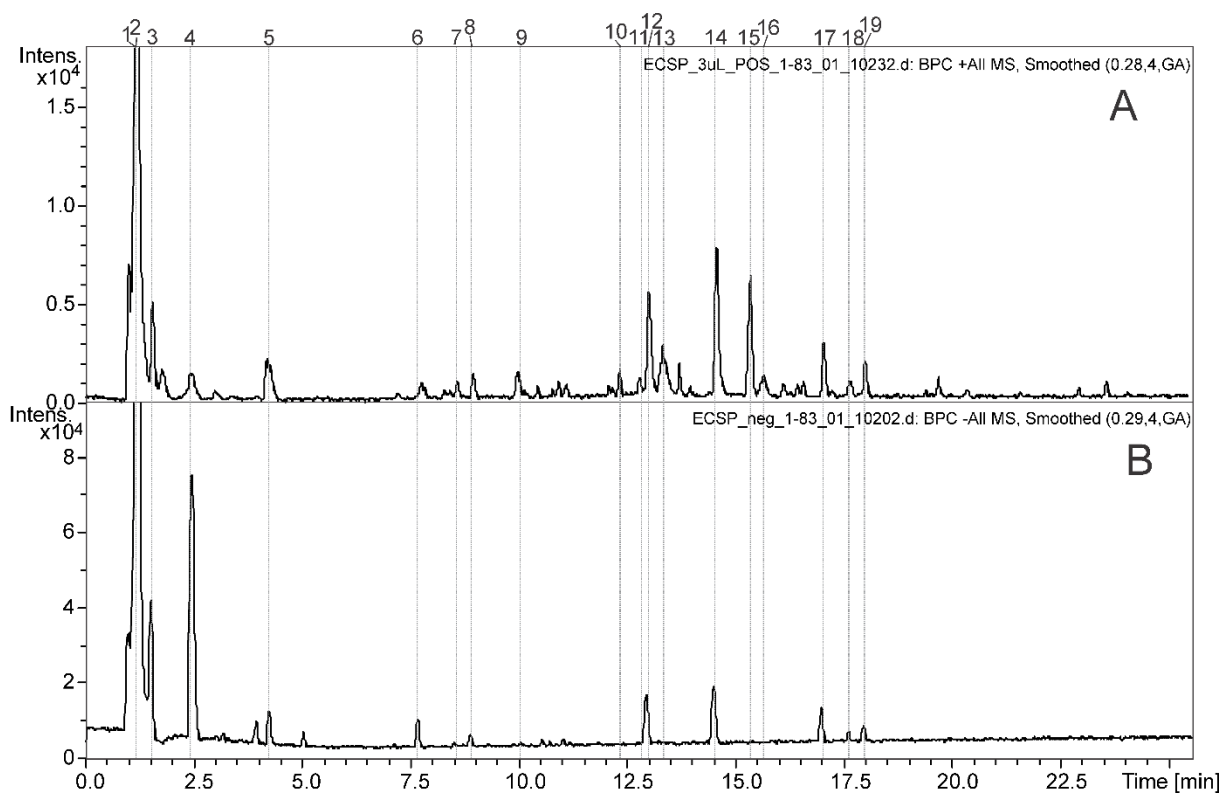

Supplement: f1 [file 3046483.f1.pdf]
